# Supplementary material for: Gallium-Indium-Tin Eutectic as a Self-Healing Room-Temperature Liquid Metal Anode for High-Capacity Lithium-Ion Batteries
Source: MDPI journal article supplement (doi:10.3390/ma15010168), 2021-12-27
Supplement: s1 [file s1]

## Article

# Gallium-Indium-Tin Eutectic as a Self-Healing Room-Temperature Liquid Metal Anode for High-Capacity Lithium-Ion Batteries

Weldejewergis Gebrewahid Kidanu <sup>1,2</sup>, Jaehyun Hur <sup>1,\*</sup> and Il Tae Kim <sup>1,\*</sup>

<sup>1</sup> Department of Chemical and Biological Engineering, Gachon University, Seongnam-Si 13120, Gyeonggi-do, Korea; weldatmail@gmail.com

<sup>2</sup> Department of Chemical Engineering, Ethiopian Institute of Technology-Mekelle (EIT-M), Mekelle University, Mekelle 231, Tigray, Ethiopia

\* Correspondence: jhhur@gachon.ac.kr (J.H.); itkim@gachon.ac.kr (I.T.K.); Tel.: +82-31-750-5593 (J.H.); +82-31-750-8835 (I.T.K.)

## Calculating theoretical specific capacities

The theoretical specific capacities of the electrodes were calculated as:

$$C_{sp}^{th} = \frac{nF}{\sum M'} \quad (1)$$

where  $C_{sp}^{th}$  is the theoretical specific capacity,  $n$  is the number of moles of electrons involved in the reaction,  $F$  is the Faraday constant (26.8 Ah g<sup>-1</sup>), and  $\sum M'$  is the sum of the molecular weights of the reactants (in grams). The theoretical capacities of pure Ga, In, and Sn were 769, 1012, and 990 mAh g<sup>-1</sup>, respectively. Hence, the theoretical specific capacity of EGaInSn at a composition of Ga (62%), In (22%), and Sn (16%) was

$$\begin{aligned} &= 769 \times 0.62 + 1012 \times 0.22 + 990 \times 0.16 \text{ mAh g}^{-1} \\ &= 857.82 \text{ mAh g}^{-1}. \end{aligned}$$

**Table S1.** Room temperature liquid metals and their melting points.

| Element/Alloy   | wt%          | Melting Point (°C) | Reference          |
|-----------------|--------------|--------------------|--------------------|
| Ga              | 100          | 29.9               | [1]                |
| In              | 100          | 156.6              |                    |
| Sn              | 100          | 231.9              |                    |
| Eutectic GaSn   | 86.5:13.5    | 20.5               |                    |
| Eutectic GaIn   | 78.6:21.4    | 15.3               |                    |
| Eutectic GaInSn | 68.5:21.5:10 | −19                | Used in this study |
| Eutectic GaInSn | 62:22:16     | 10.7               |                    |

**Table S2.** Capacity and coulombic efficiency of EGaInSn LMNP electrodes using different separators.

|                                 | Glass Fiber       |                   | Polyethylene      |                   |
|---------------------------------|-------------------|-------------------|-------------------|-------------------|
|                                 | Cycle number      |                   |                   |                   |
|                                 | 100 <sup>th</sup> | 500 <sup>th</sup> | 100 <sup>th</sup> | 500 <sup>th</sup> |
| Capacity (mAh g <sup>-1</sup> ) | 192               | 147               | 145               | 100               |
| Coulombic efficiency (%)        | 97.5              | 99.00             | 97                | 98                |
| Capacity retention (%)          | 77                |                   | 69                |                   |

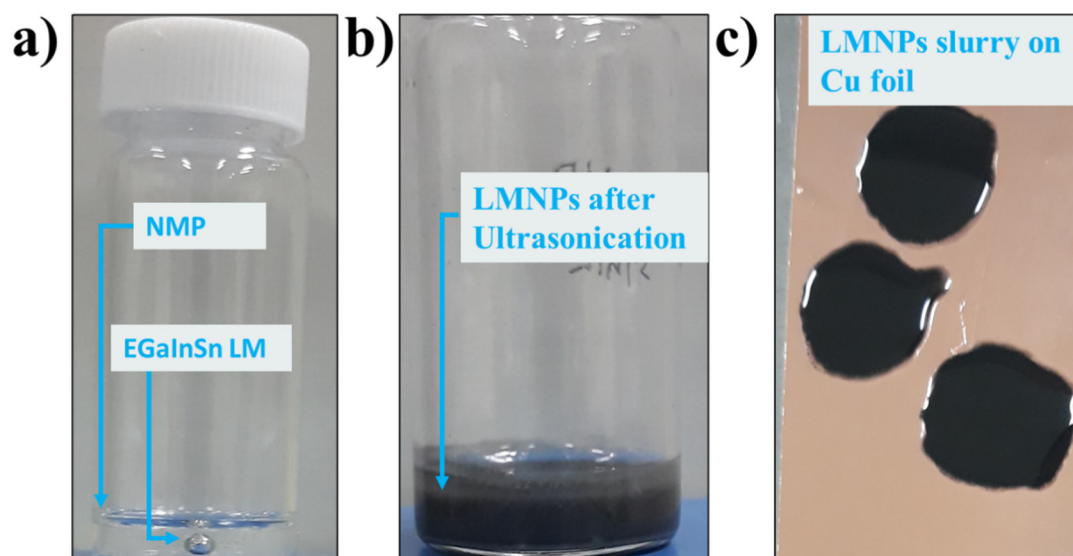

**Figure S1.** Photographs of (a) the bulk EGaInSn liquid metal (LM) in NMP, (b) LMNPs after ultrasonication in NMP, and (c) the EGaInSn LMNP slurry on a Cu foil.

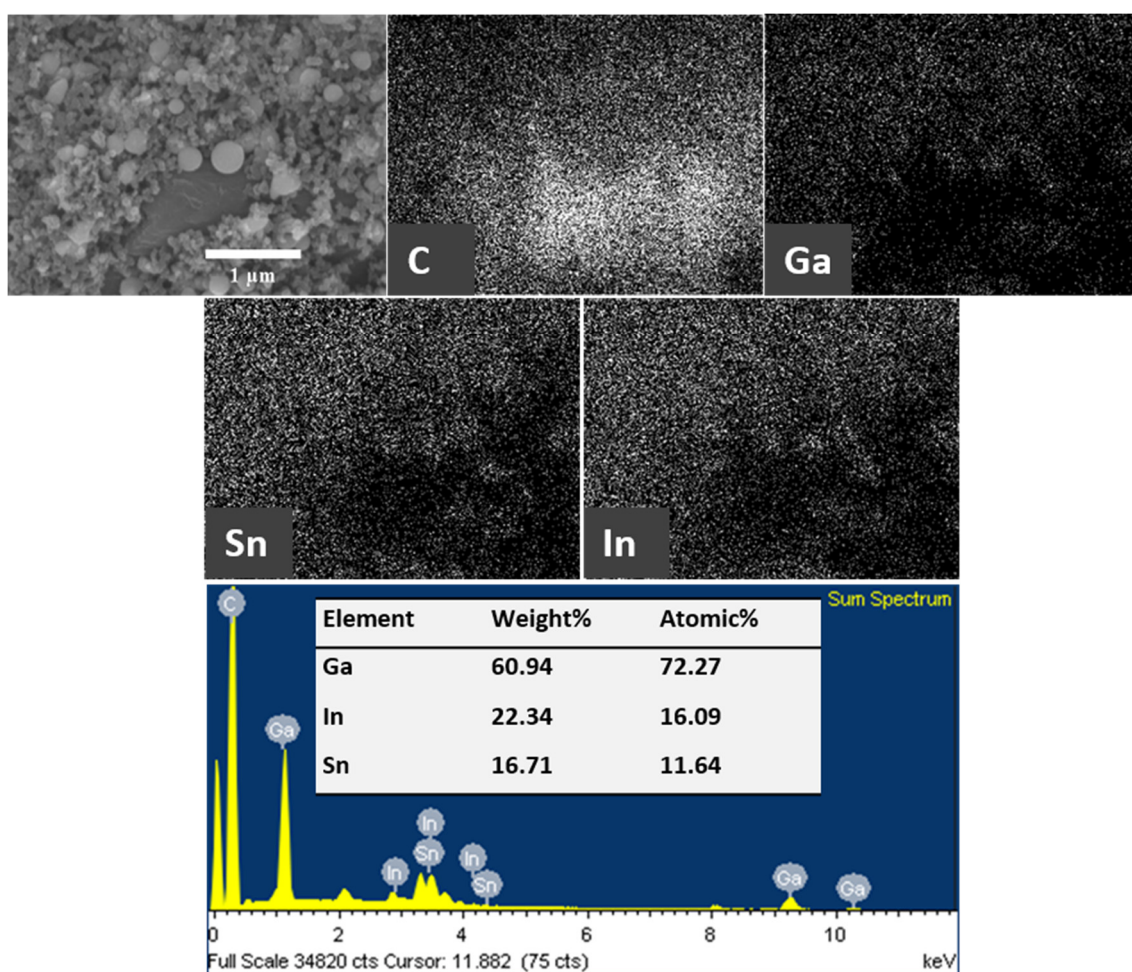

**Figure S2.** Elemental mapping and SEM/EDS spectra of as-prepared EGaInSn LMNP electrodes.

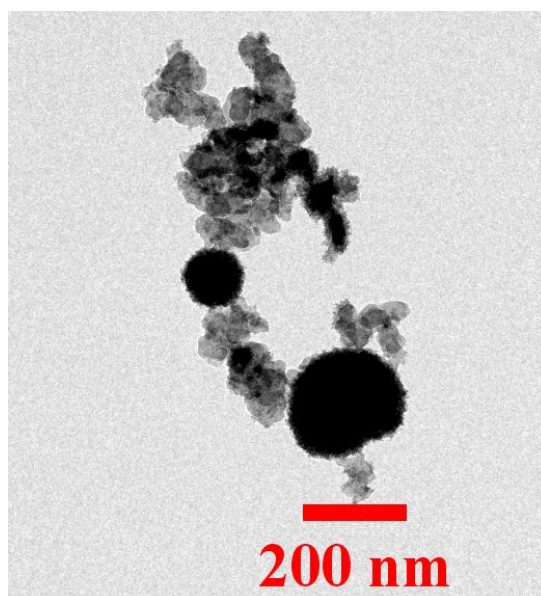

**Figure S3.** TEM image of as-prepared EGaInSn LMNPs.

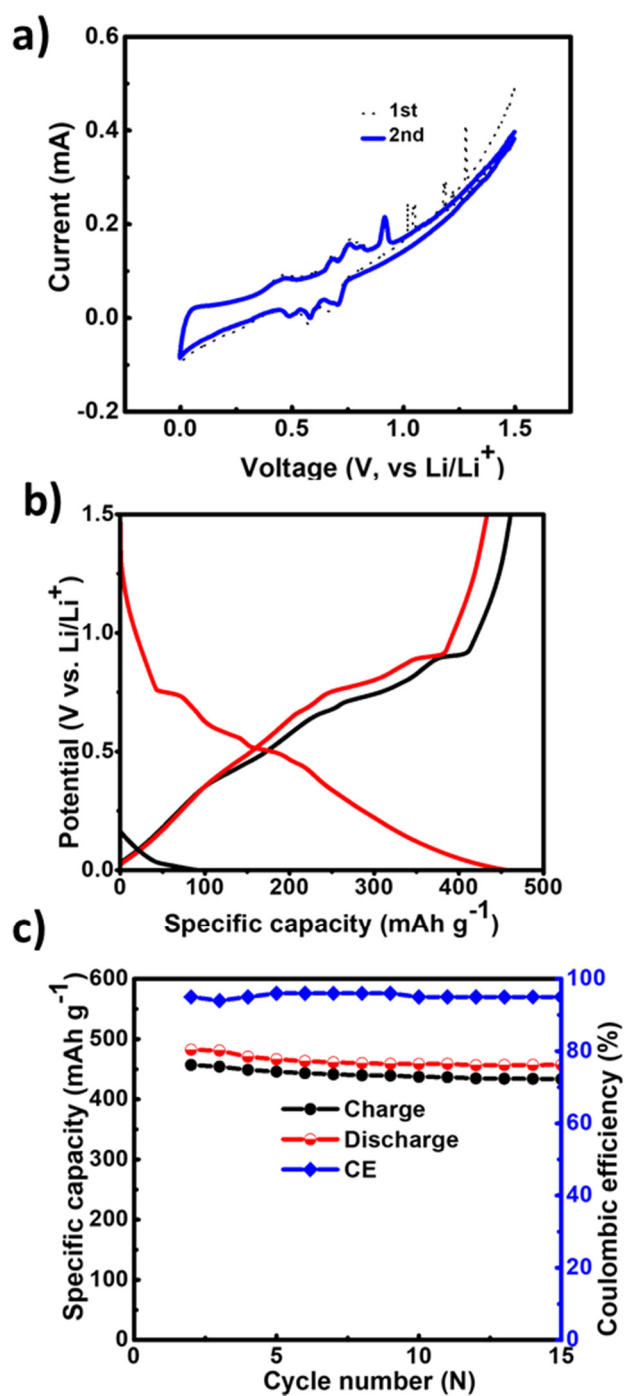

**Figure S4.** (a) CV, (b) typical potential profiles, and (c) initial cycling behaviors after CV measurements of the EGaInSn LMNP electrodes using a PE separator.

## References

- [1] M. Song, J. Niu, W. Cui, Q. Bai, Z. Zhang, Self-healing liquid Ga-based anodes with regulated wetting and working temperatures for advanced Mg ion batteries, *J. of Mater. Chem. A*, **2021**, *9*, 17019–17029.
